# Supplementary material for: Effect of new carbonyl cyanide aromatic hydrazones on biofilm inhibition against methicillin resistant Staphylococcus aureus
Source: PubMed Central journal article supplement (PMC9053579; doi:10.1039/d0ra03124k), 2020-05-07
Supplement: RA-010-D0RA03124K-s001.pdf [file RA-010-D0RA03124K-s001.pdf]

**Effect of new carbonyl cyanide aromatic hydrazones on  
biofilm inhibition against Methicillin Resistant  
*Staphylococcus Aureus***

Xueer Lu,<sup>a,b</sup> Ziwen Zhang,<sup>c</sup> Yingying Xu,<sup>c</sup> Jun Lu,<sup>a</sup> Wenjian Tang,<sup>c</sup> Jing Zhang<sup>a,b,\*</sup>

<sup>a</sup> School of Medicine, Anhui University of Science and Technology, Huainan 232001, China

<sup>b</sup> Anhui Prevention and Treatment Center for Occupational Disease, Anhui No. 2 Provincial People's Hospital, Hefei 230022, China

<sup>c</sup> School of Pharmacy, Anhui Medical University, Hefei 230032, China

**Content**

**Copies of NMR spectra of compounds 2a-2q**

**S2–S18**

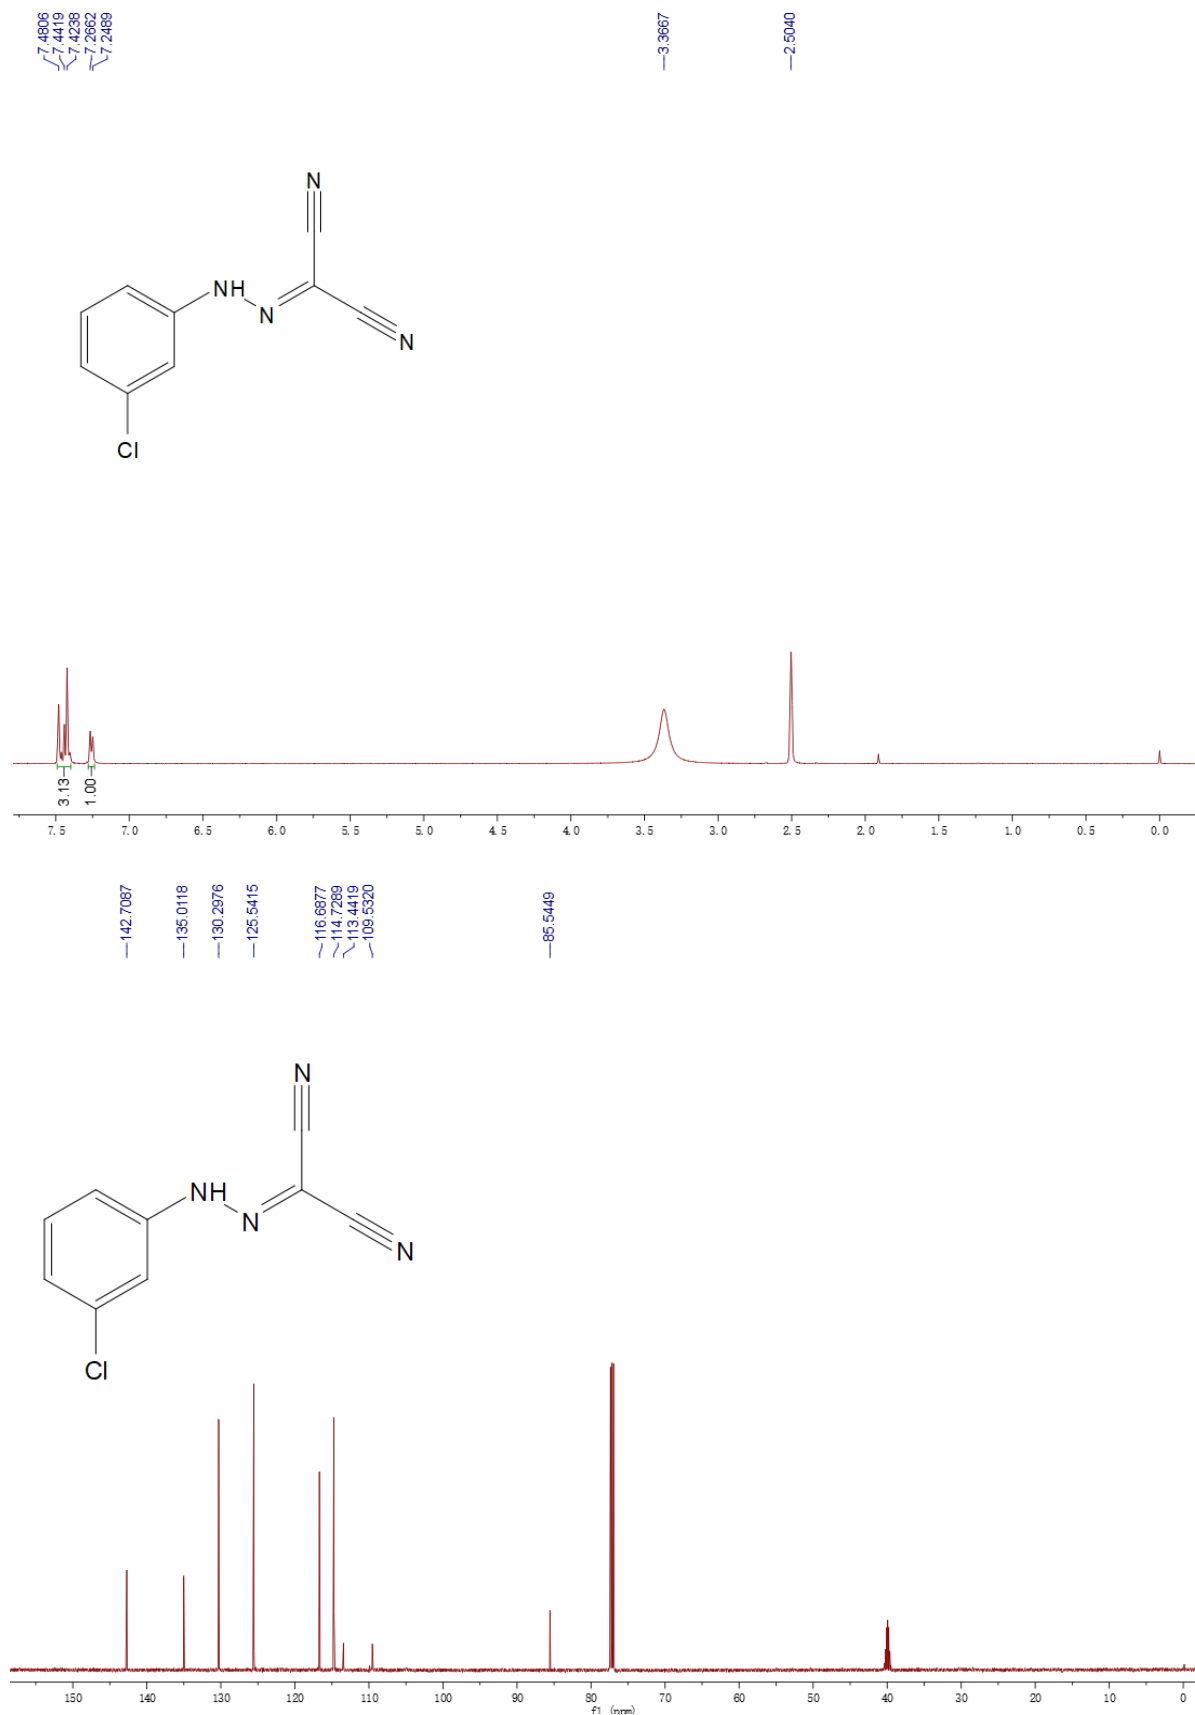

**Figure S1.**  $^1\text{H-NMR}$  and  $^{13}\text{C-NMR}$  spectra of compound **2a**.

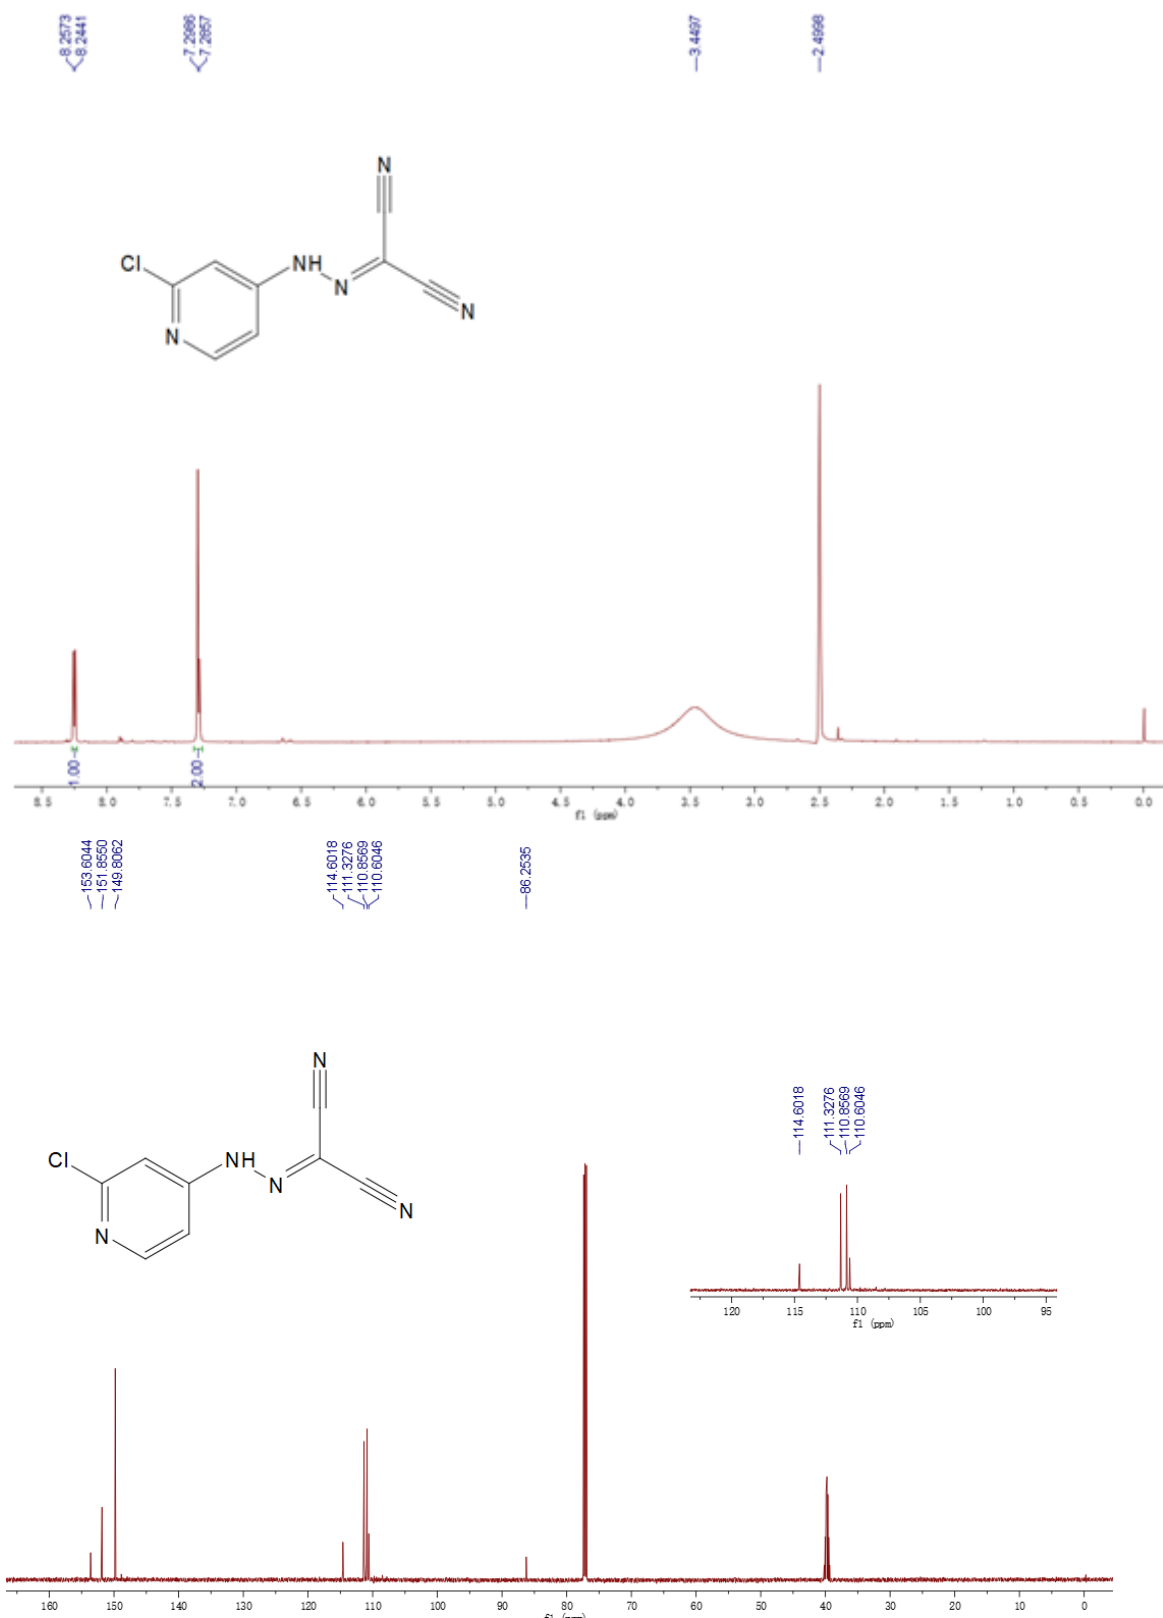

**Figure S2.** <sup>1</sup>H-NMR and <sup>13</sup>C-NMR spectra of compound **2b**.

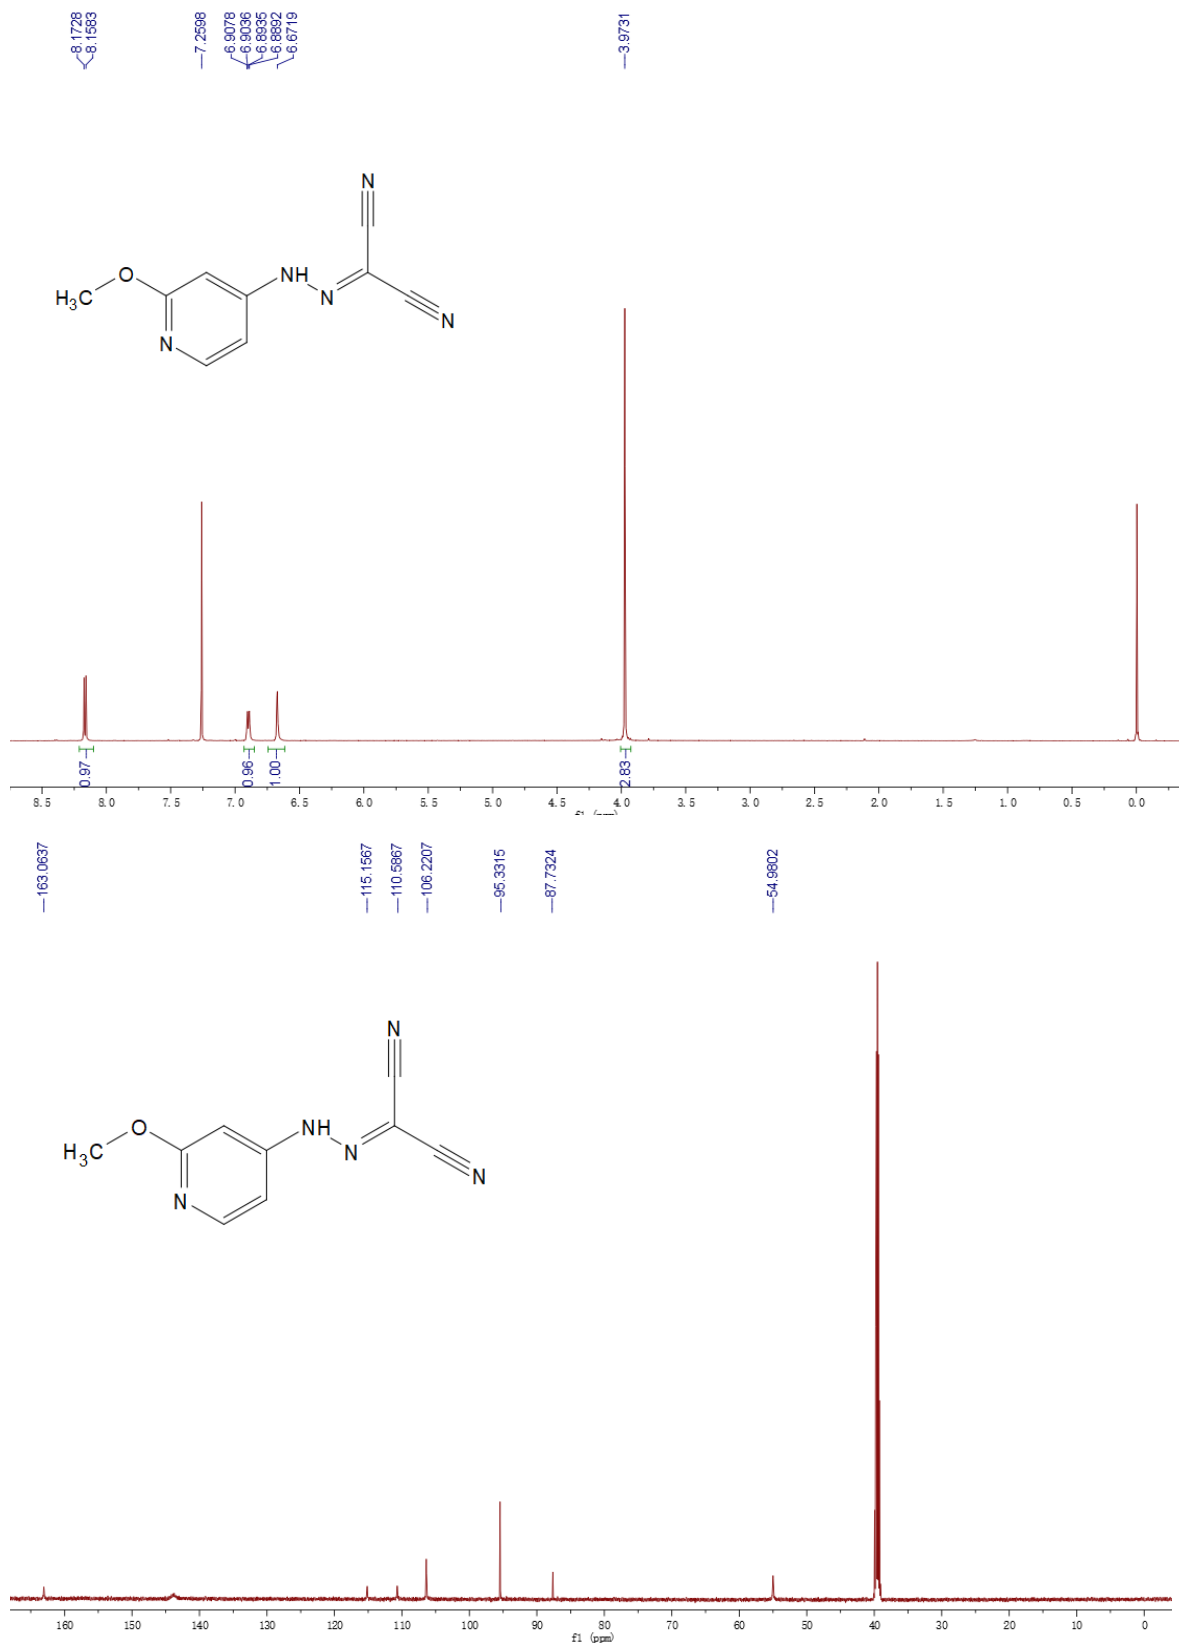

**Figure S3.** <sup>1</sup>H-NMR and <sup>13</sup>C-NMR spectra of compound **2c**.

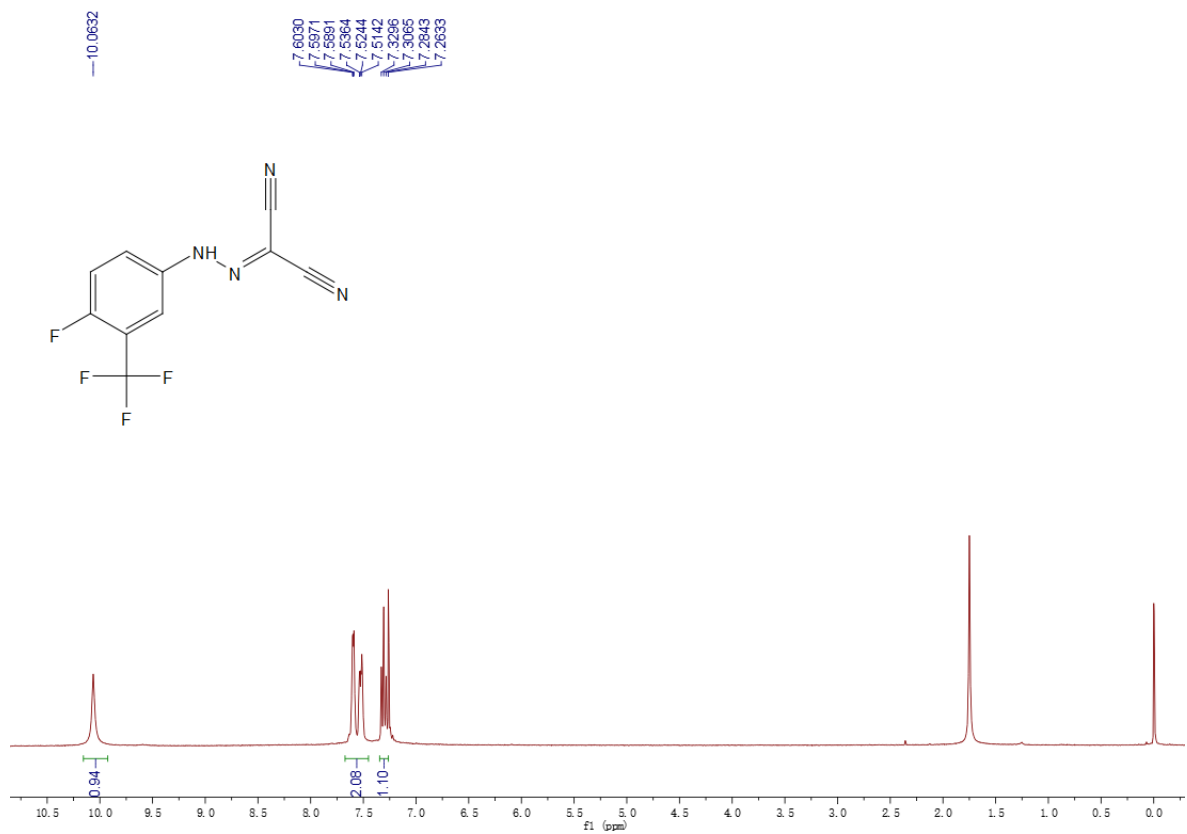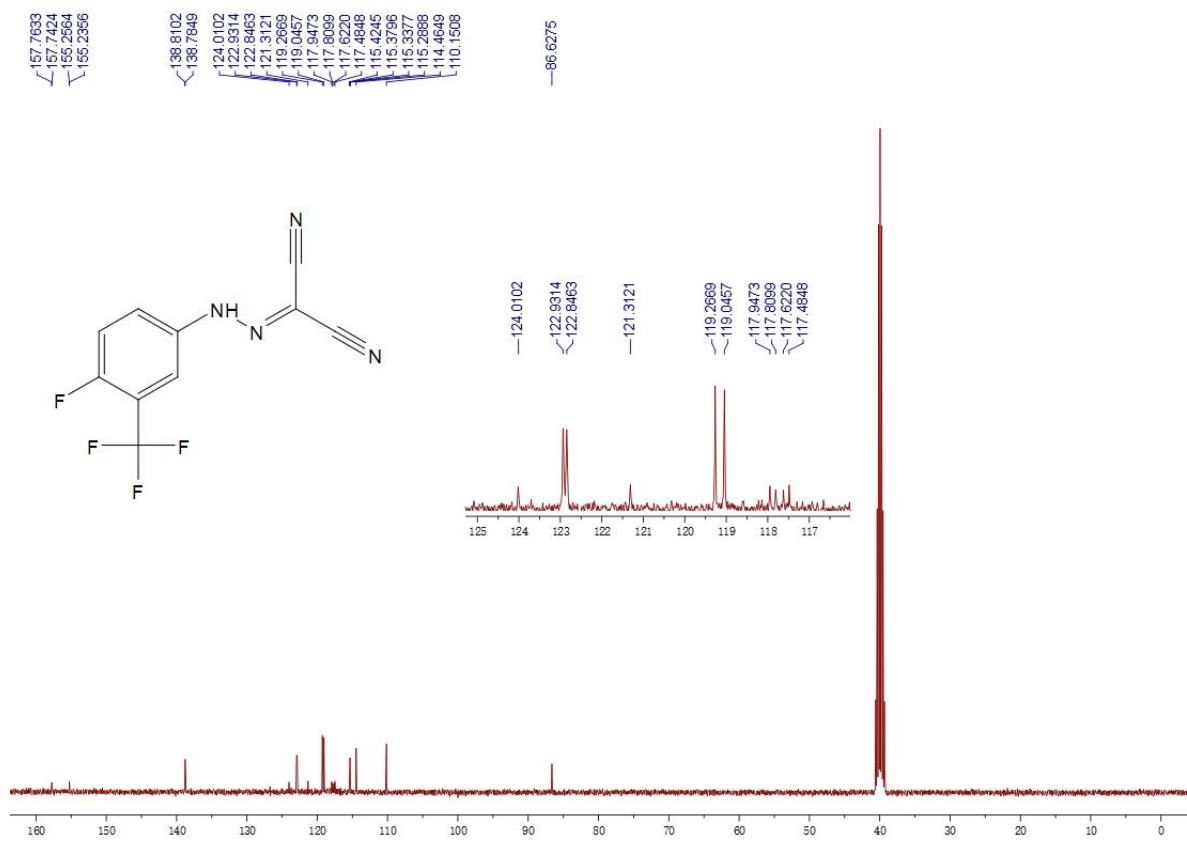

Figure S4.  $^1\text{H-NMR}$  and  $^{13}\text{C-NMR}$  spectra of compound 2d.

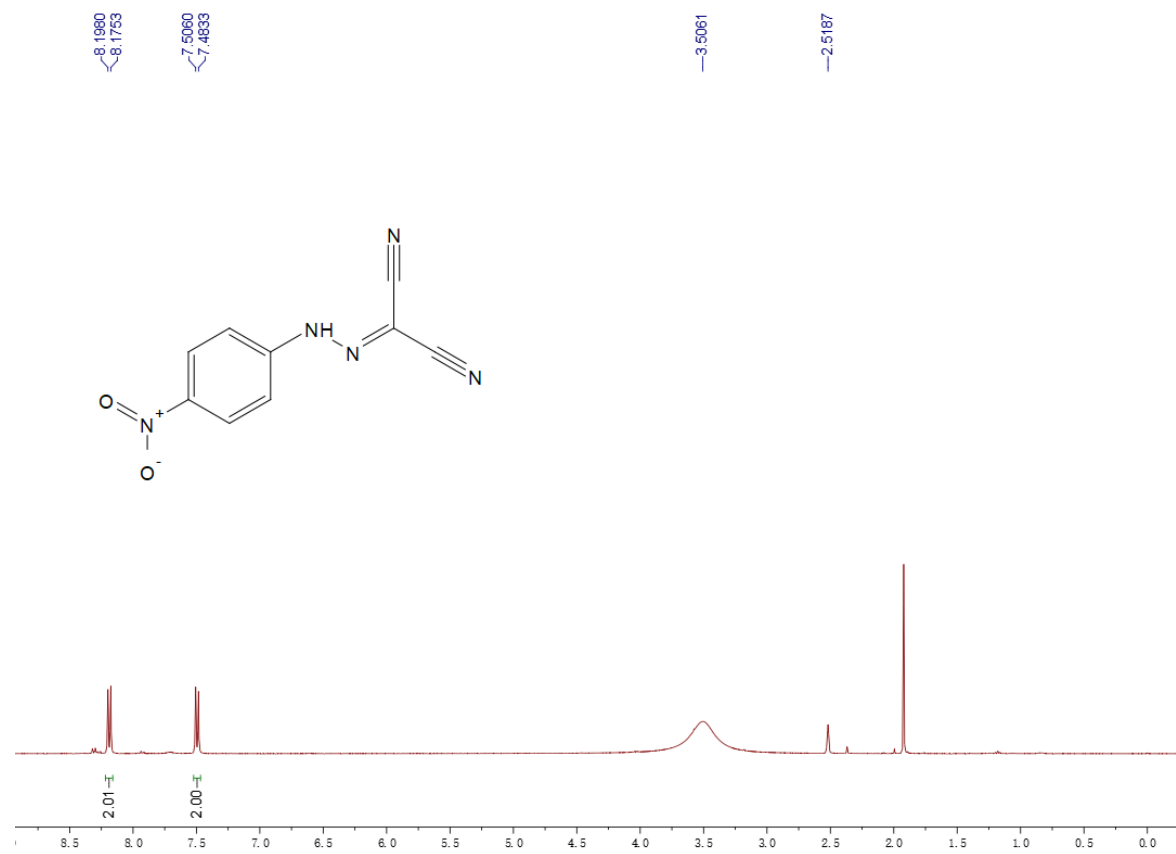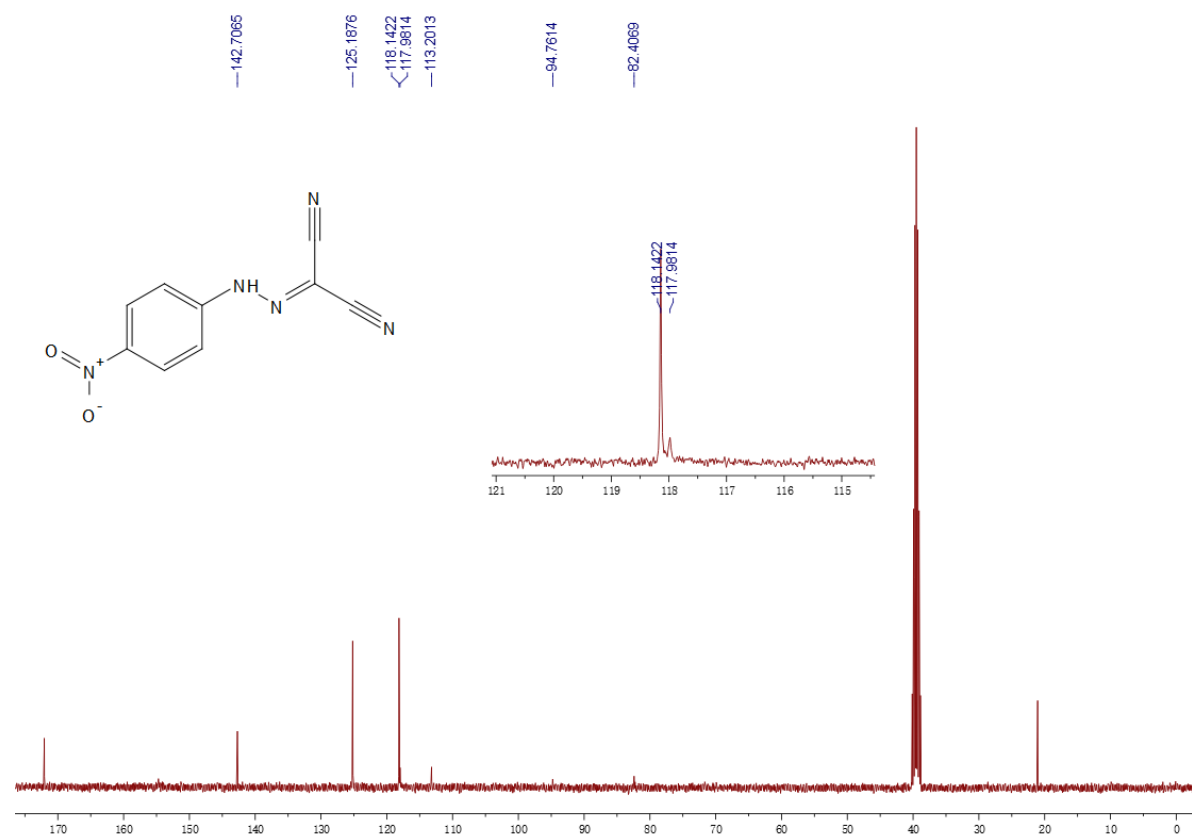

**Figure S5.** <sup>1</sup>H-NMR and <sup>13</sup>C-NMR spectra of compound **2e**.

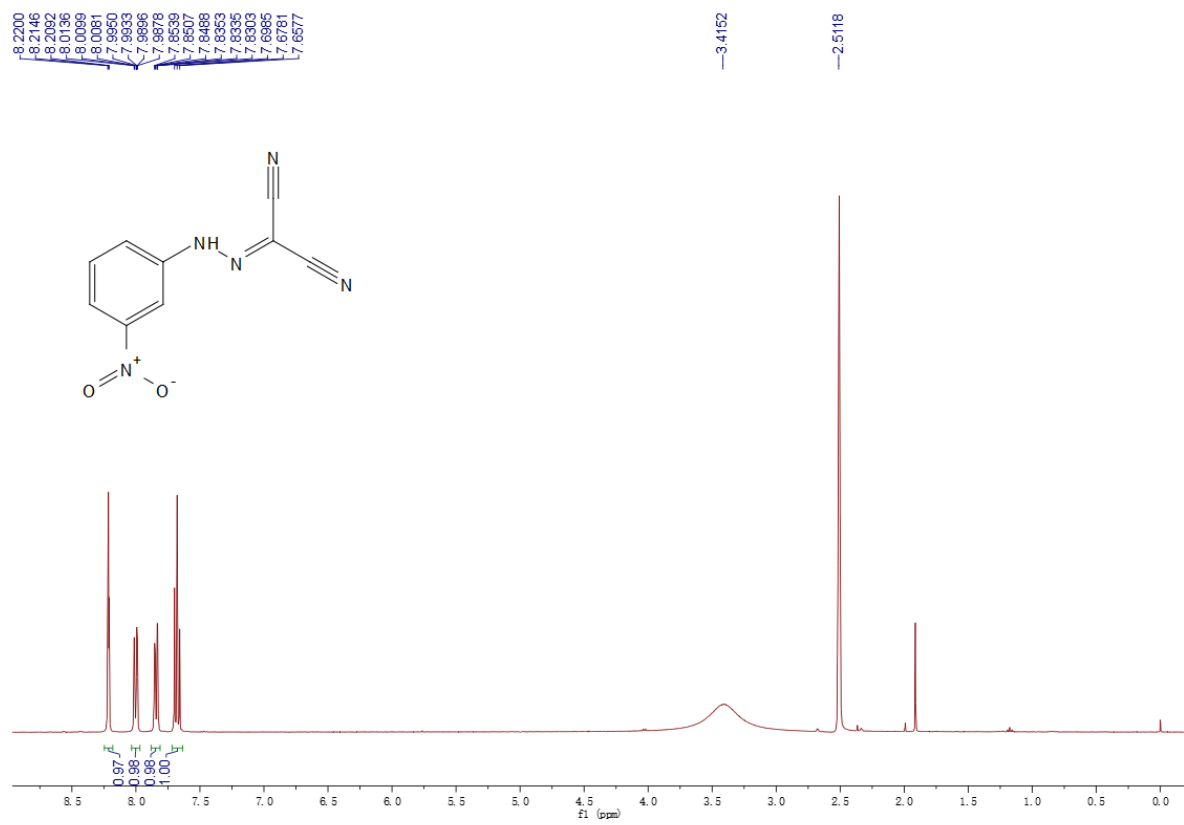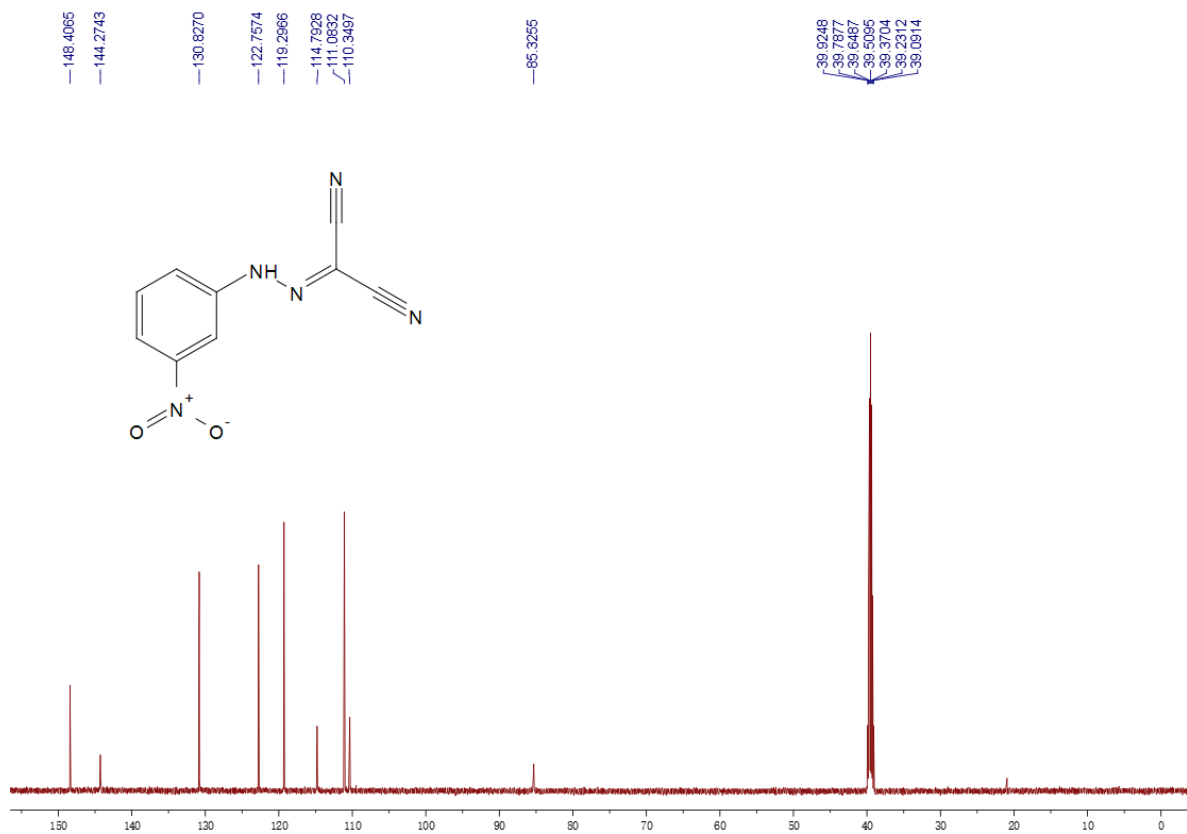

Figure S6. <sup>1</sup>H-NMR and <sup>13</sup>C-NMR spectra of compound **2f**.

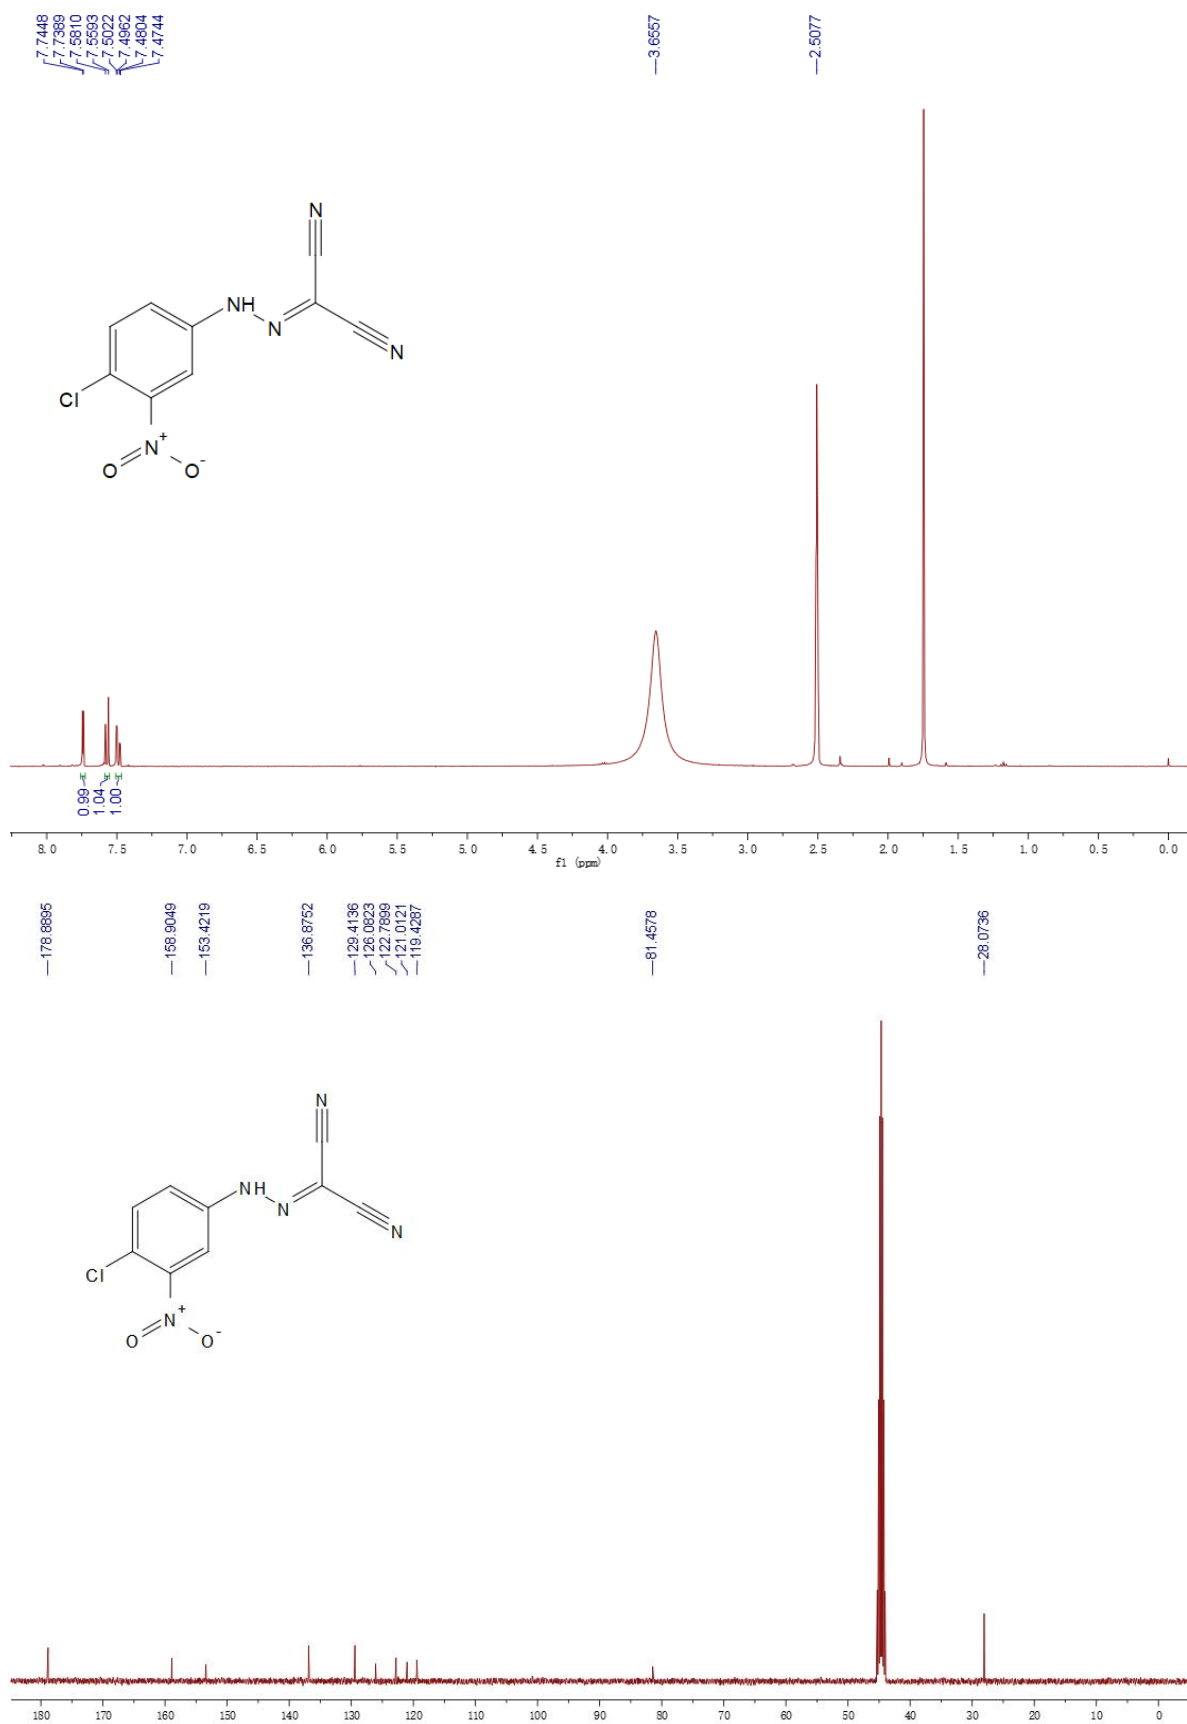

**Figure S7.** <sup>1</sup>H-NMR and <sup>13</sup>C-NMR spectra of compound **2g**



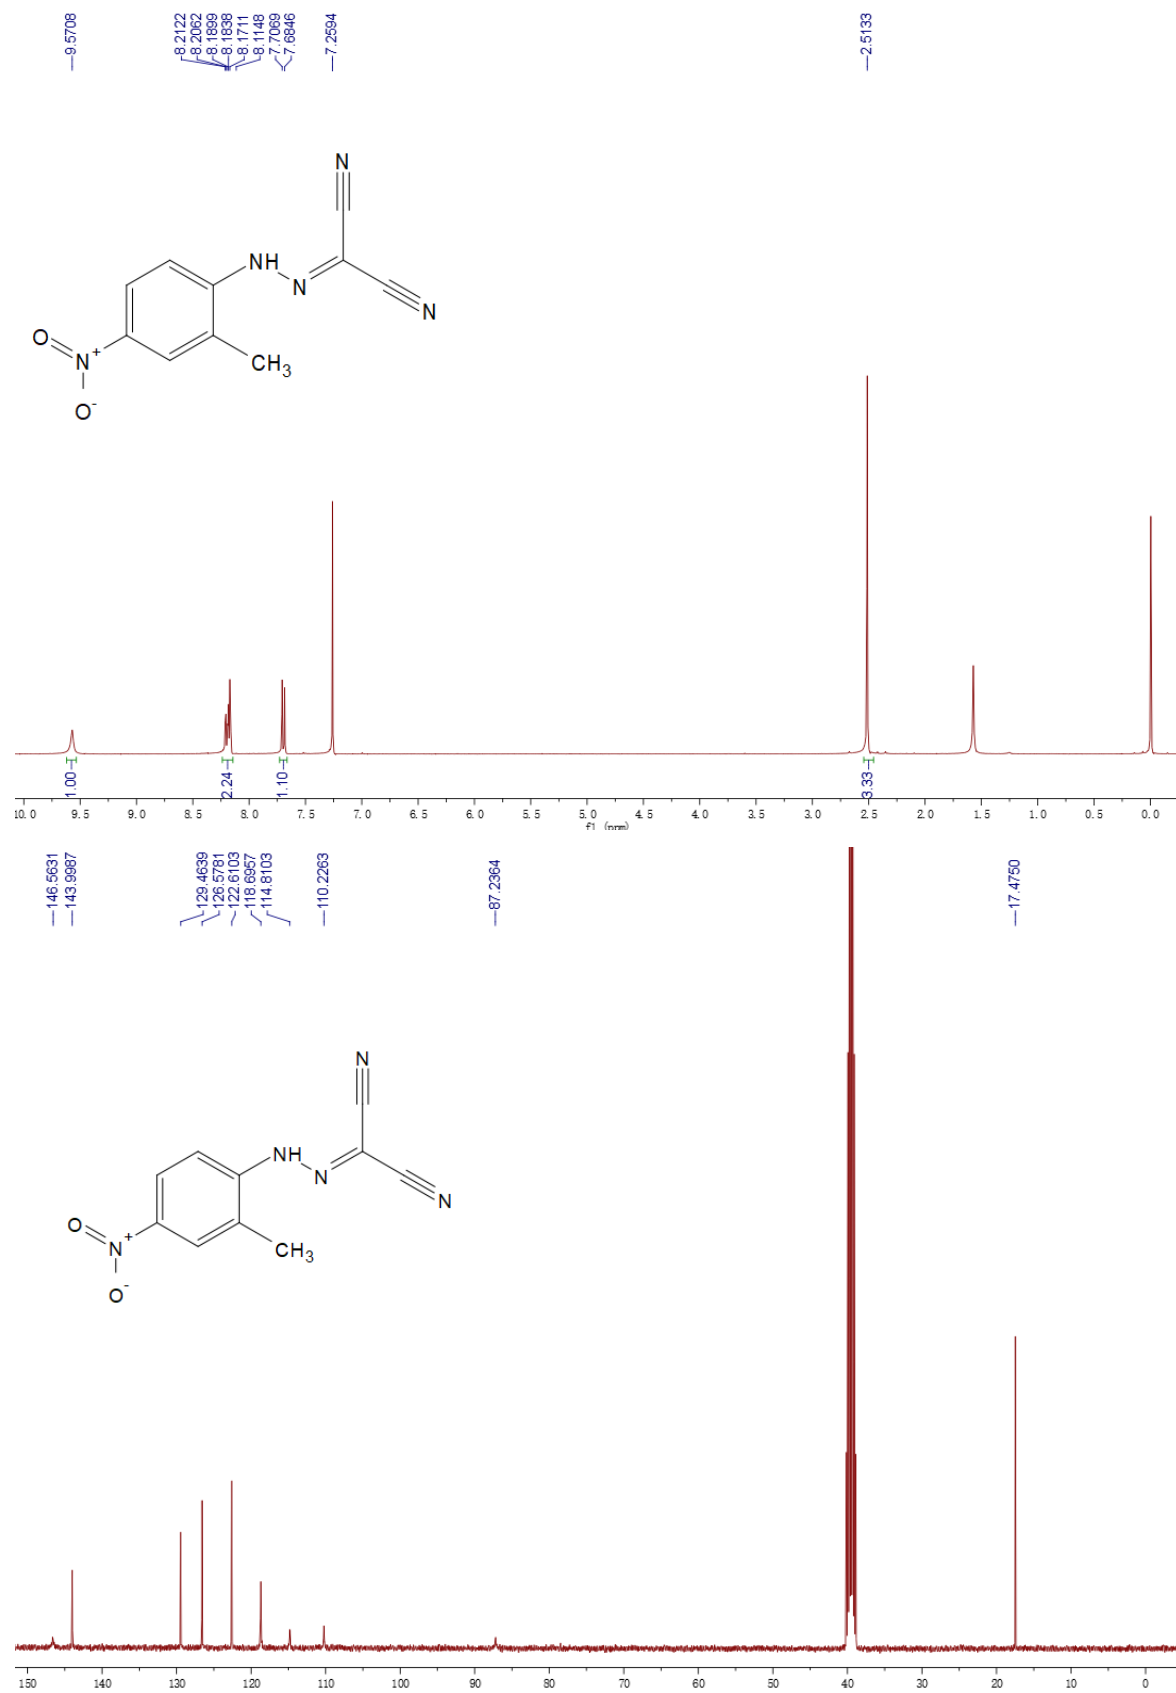

**Figure S8.** <sup>1</sup>H-NMR and <sup>13</sup>C-NMR spectra of compound **2h**

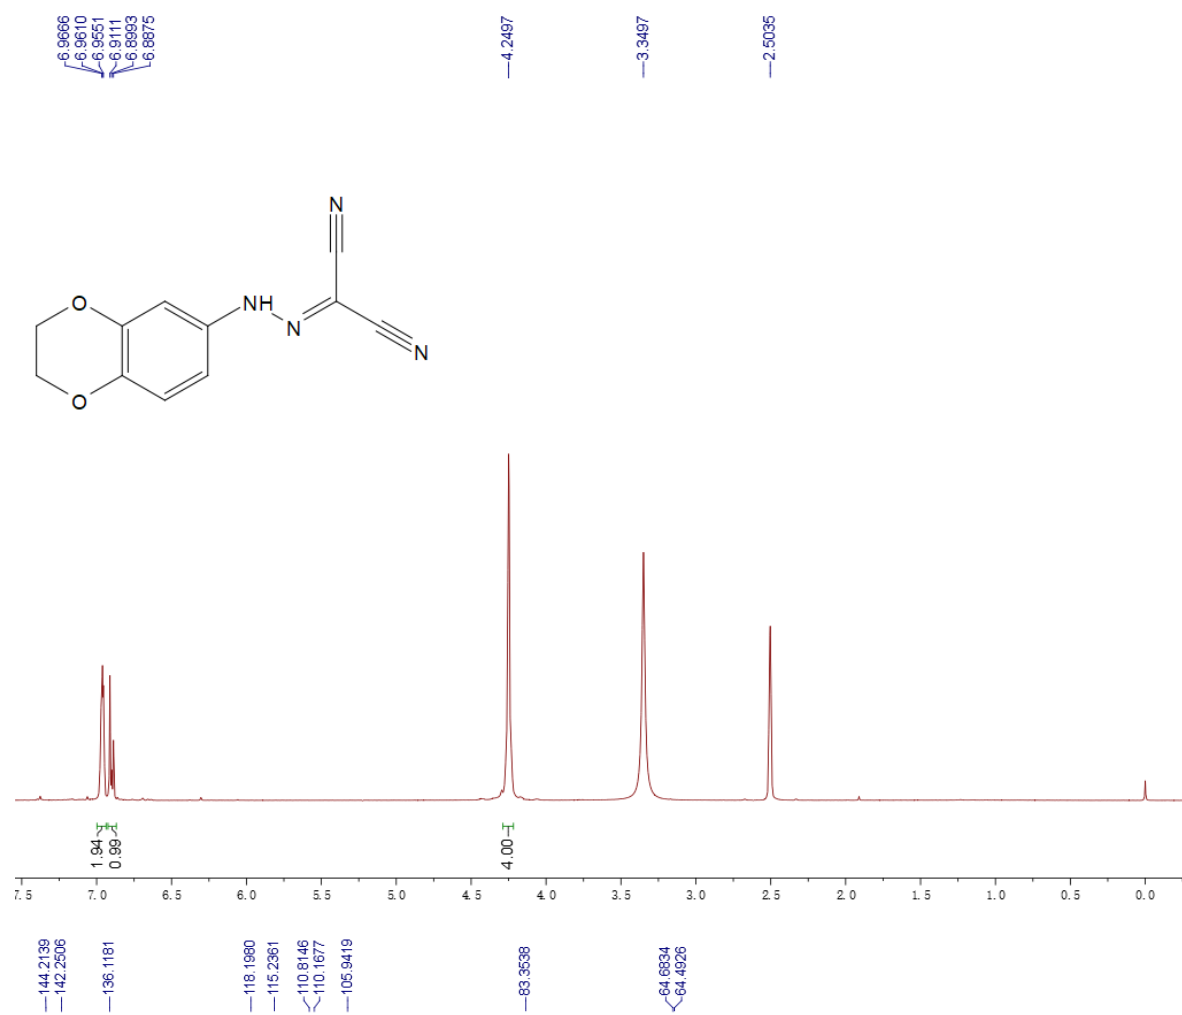

Figure S9.  $^1\text{H-NMR}$  and  $^{13}\text{C-NMR}$  spectra of compound **2i**.

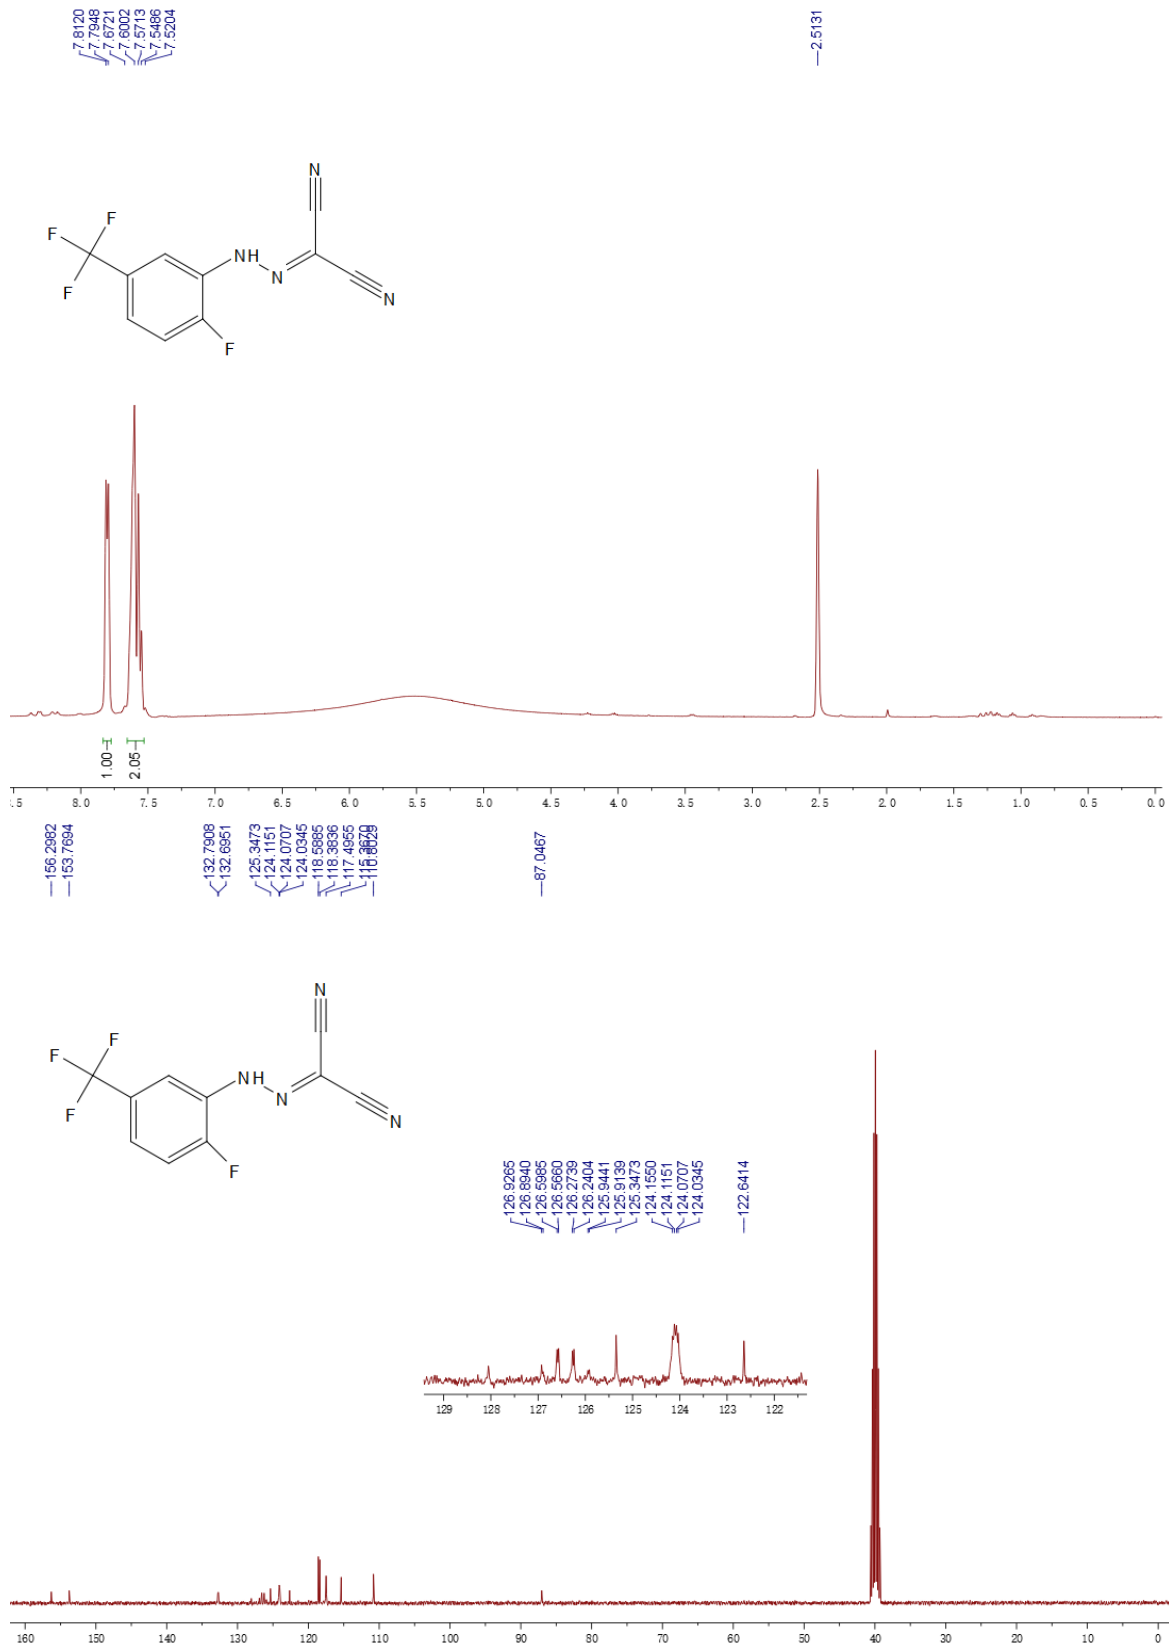

Figure S10. <sup>1</sup>H-NMR and <sup>13</sup>C-NMR spectra of compound **2j**.

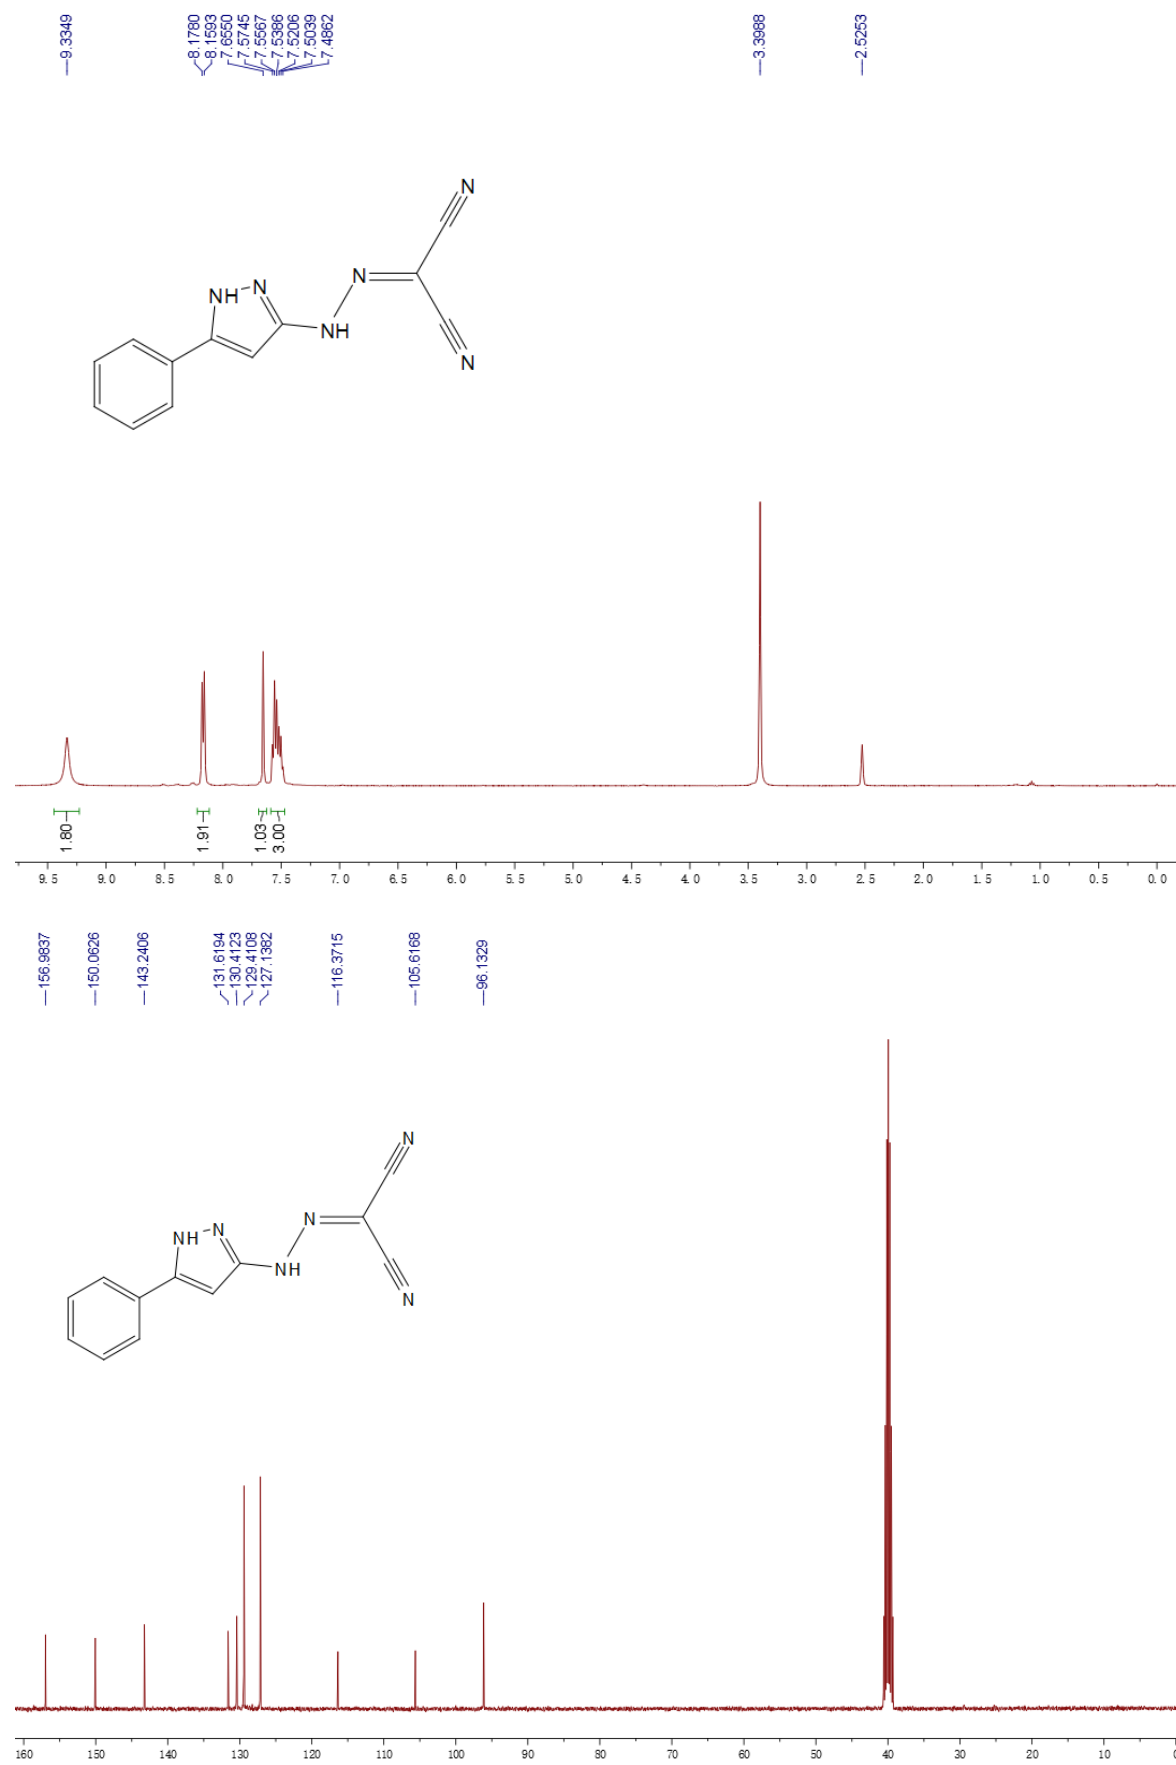

Figure S11. <sup>1</sup>H-NMR and <sup>13</sup>C-NMR spectra of compound 2k.

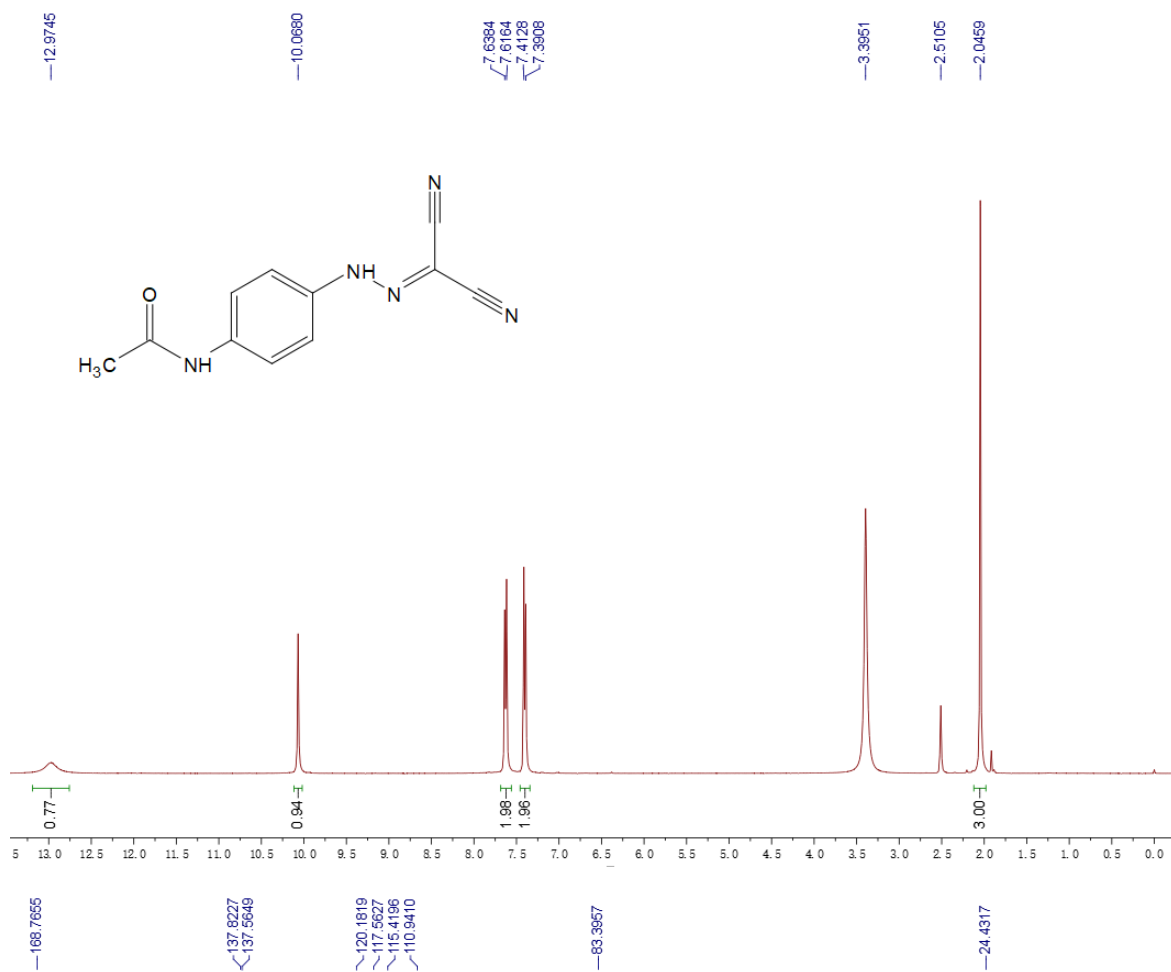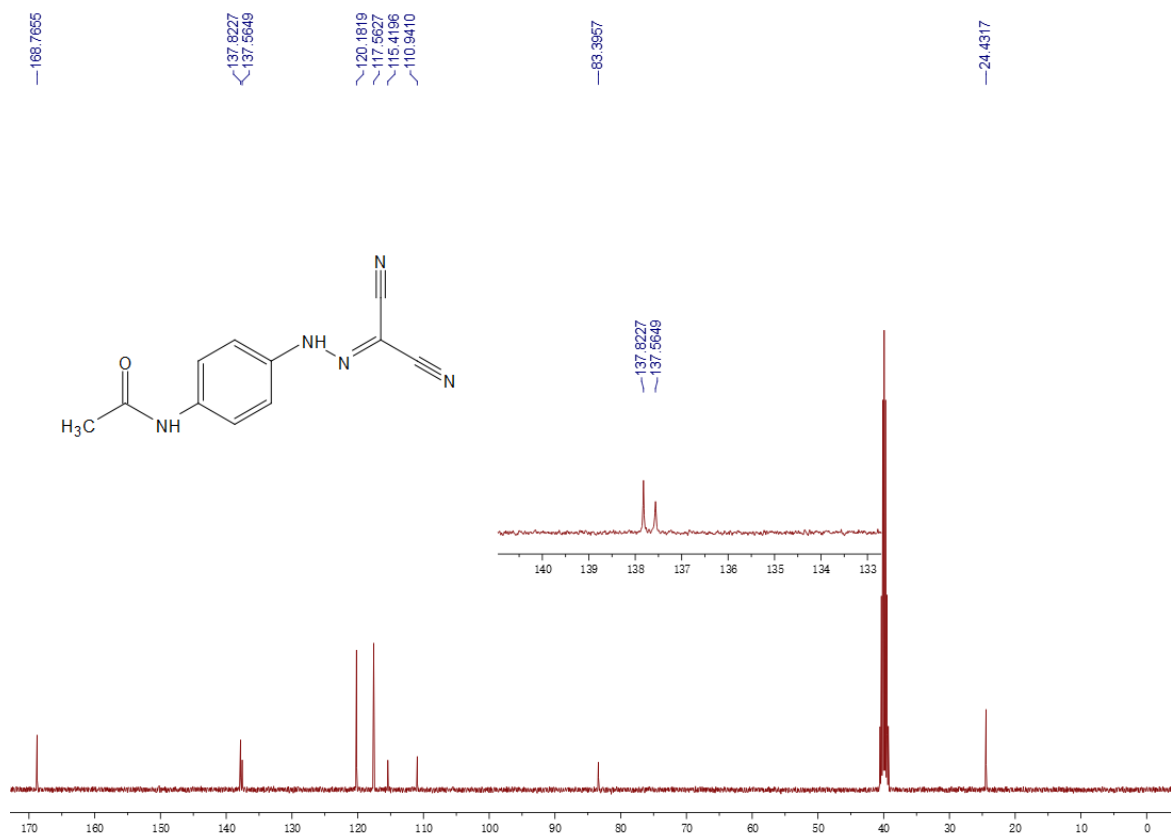

Figure S12. <sup>1</sup>H-NMR and <sup>13</sup>C-NMR spectra of compound 21.

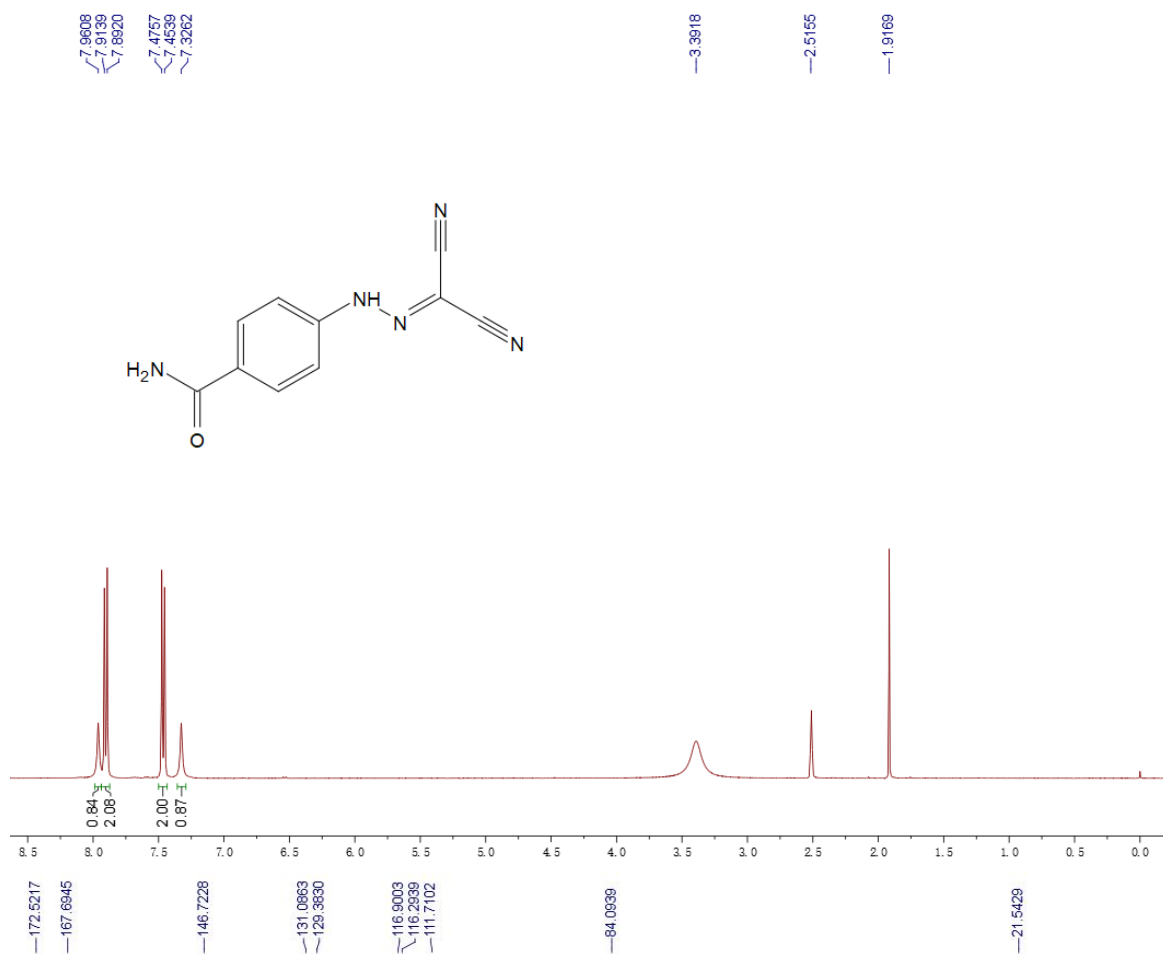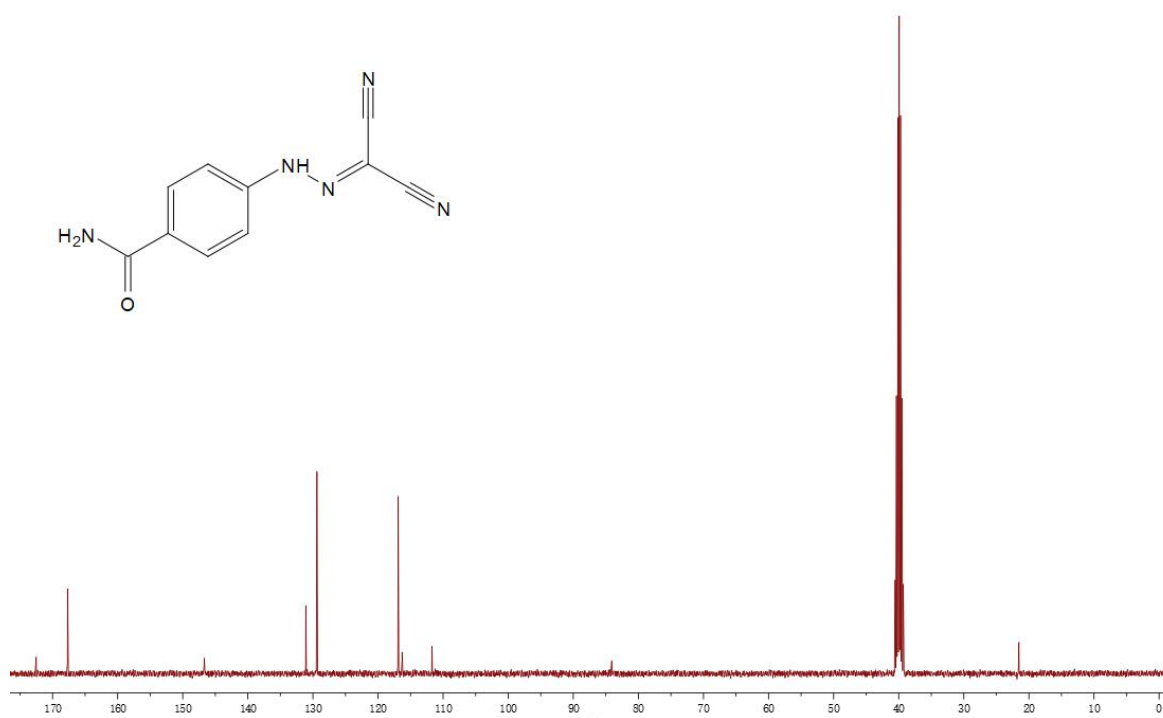

Figure S13.  $^1\text{H-NMR}$  and  $^{13}\text{C-NMR}$  spectra of compound **2m**.

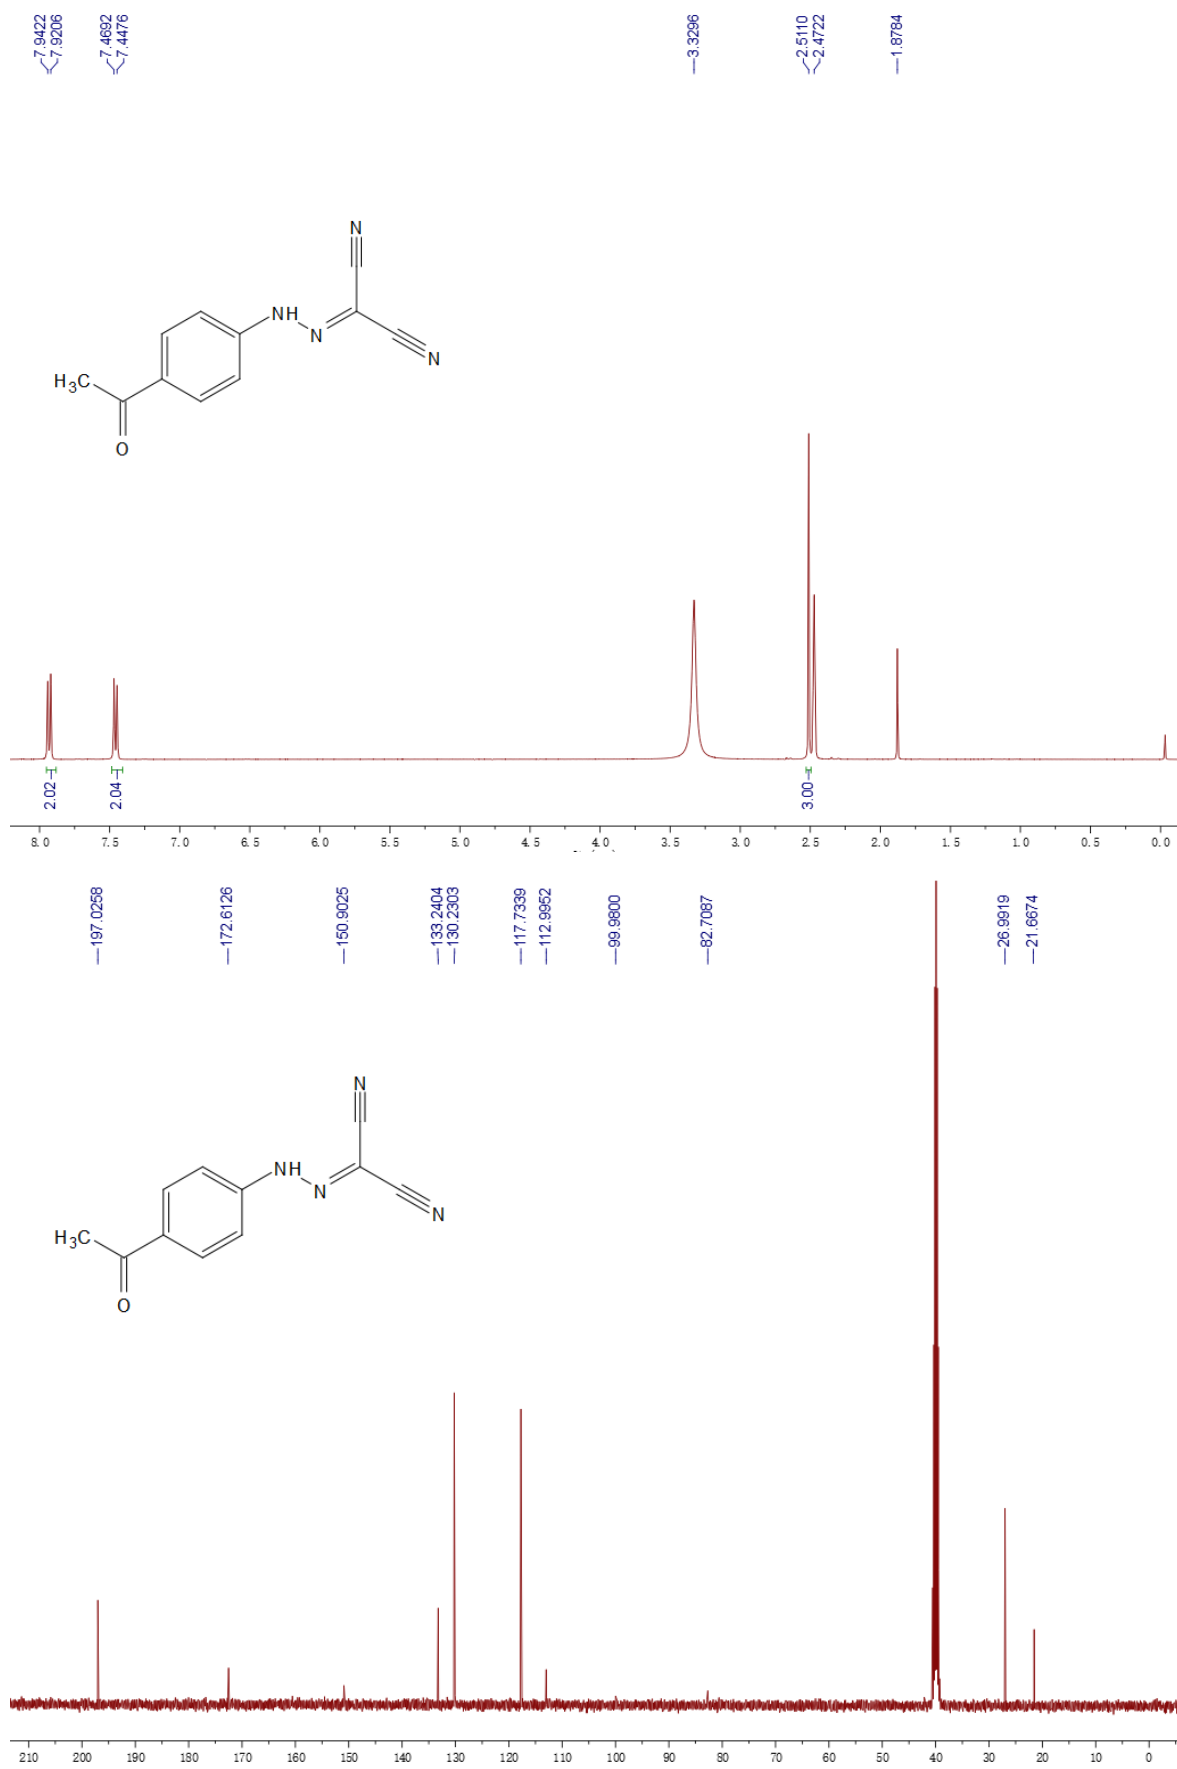

Figure S14.  $^1\text{H-NMR}$  and  $^{13}\text{C-NMR}$  spectra of compound **2n**.

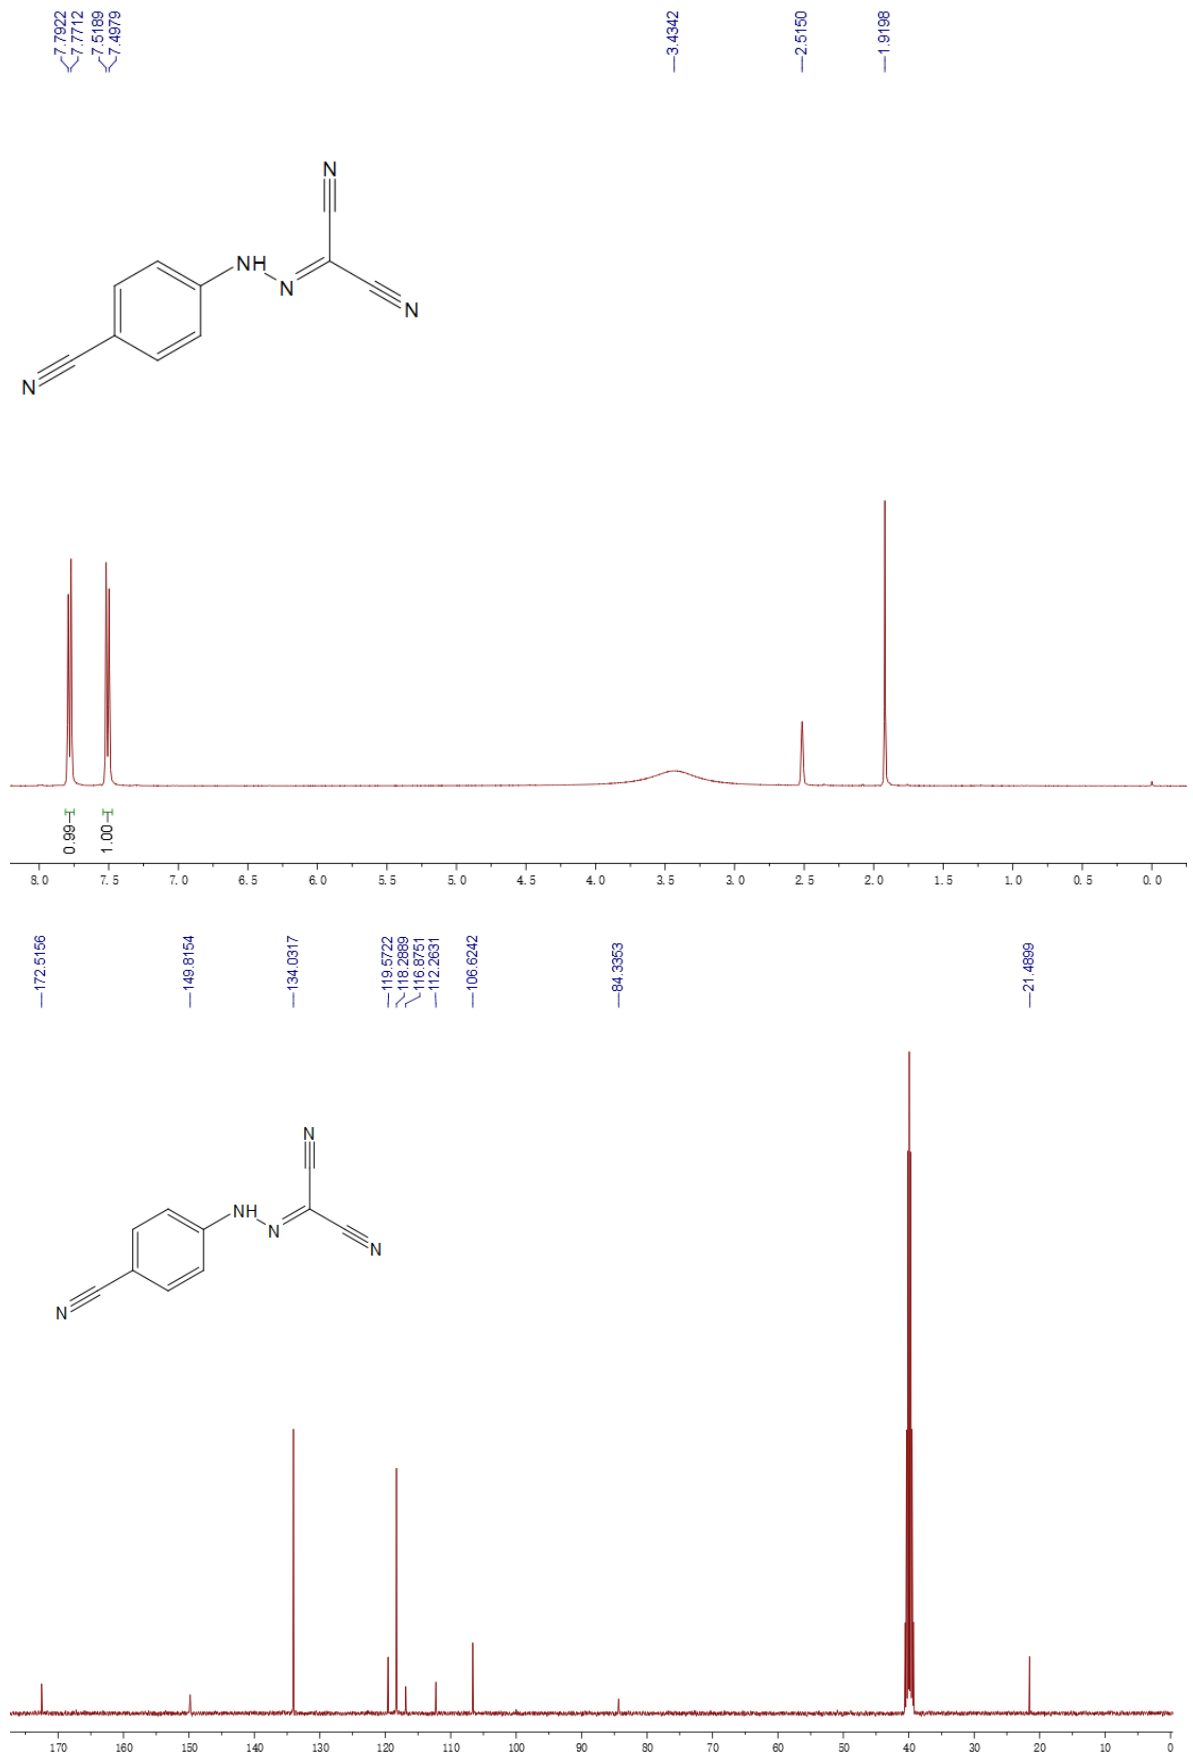

Figure S15. <sup>1</sup>H-NMR and <sup>13</sup>C-NMR spectra of compound 2o.



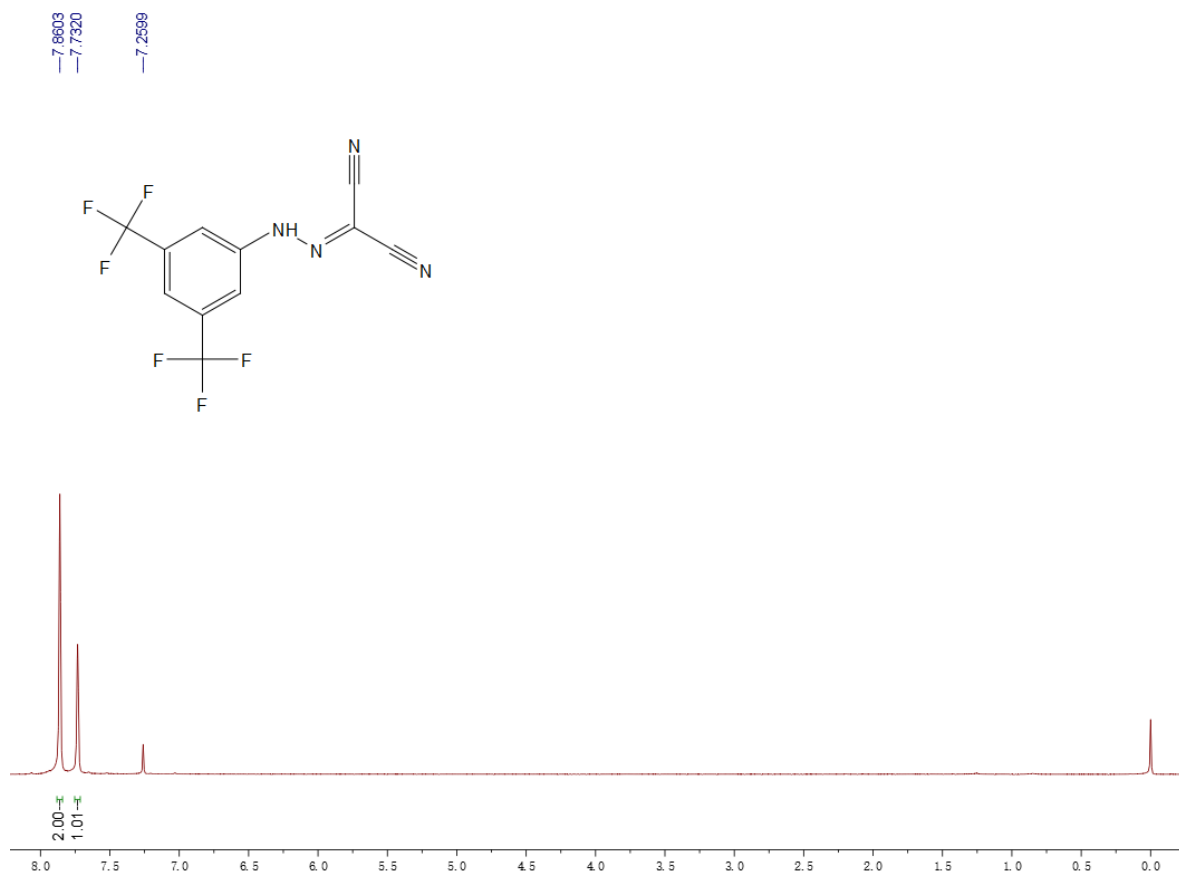

**Figure S16.**  $^1\text{H-NMR}$  spectra of compound **2p**.

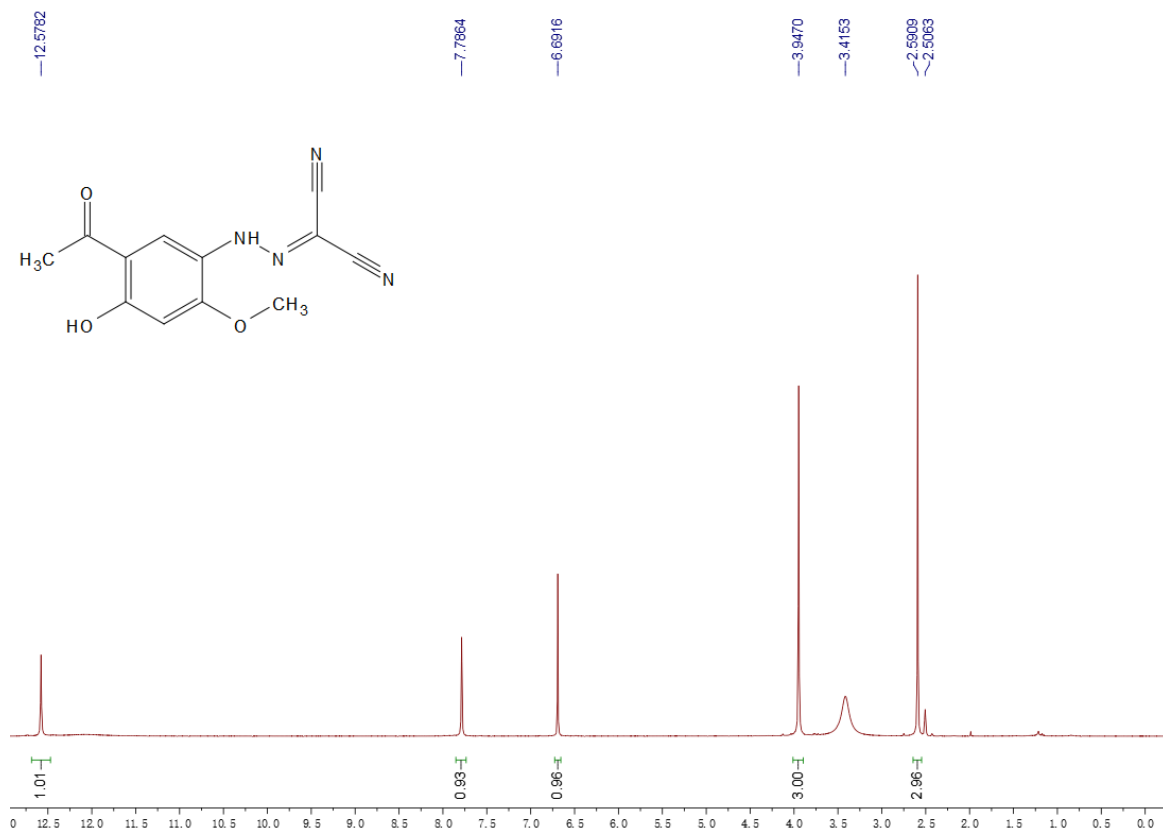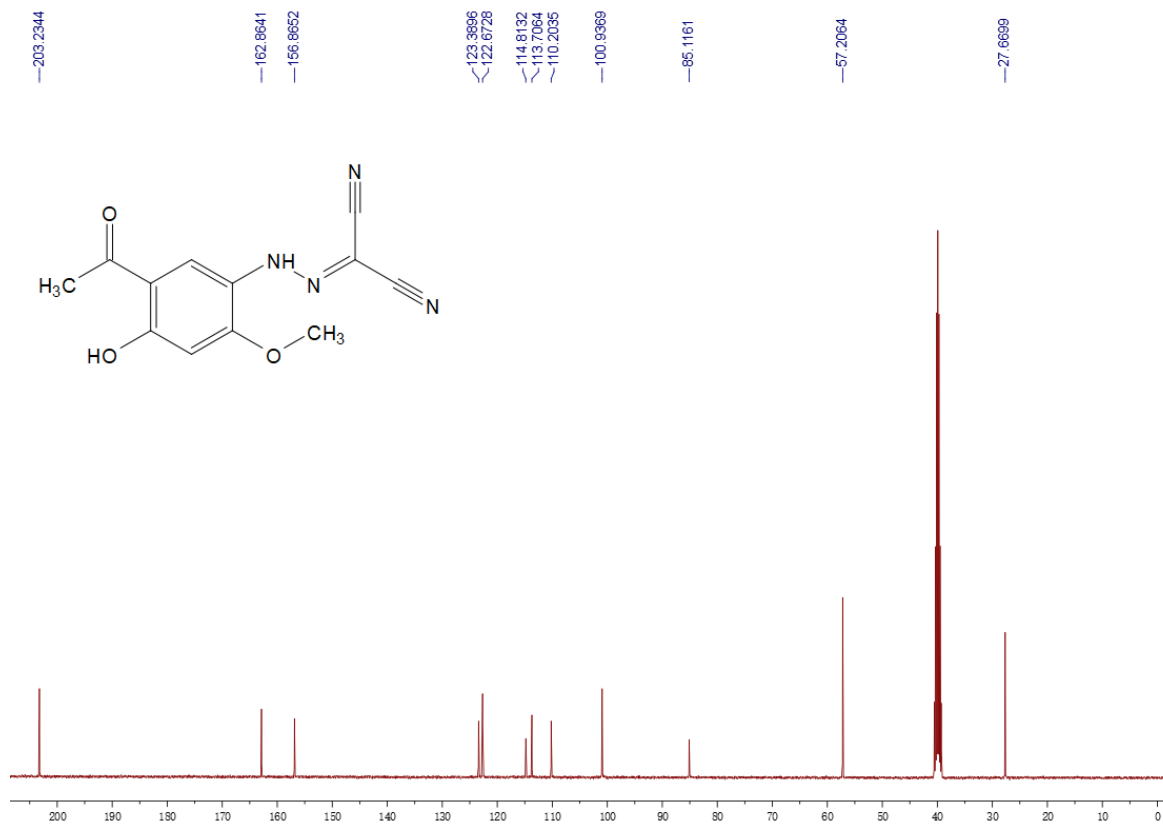

**Figure S17.**  $^1\text{H-NMR}$  and  $^{13}\text{C-NMR}$  spectra of compound **2q**.
